# Supplementary material for: Interleukin 8 activity influences the efficacy of adenoviral oncolytic immunotherapy in cancer patients
Source: PubMed Central journal article supplement (PMC5814215; doi:10.18632/oncotarget.23967), 2018-01-05
Supplement: oncotarget-09-6320-s001.pdf [file oncotarget-09-6320-s001.pdf]

# Interleukin 8 activity influences the efficacy of adenoviral oncolytic immunotherapy in cancer patients

## SUPPLEMENTARY MATERIALS

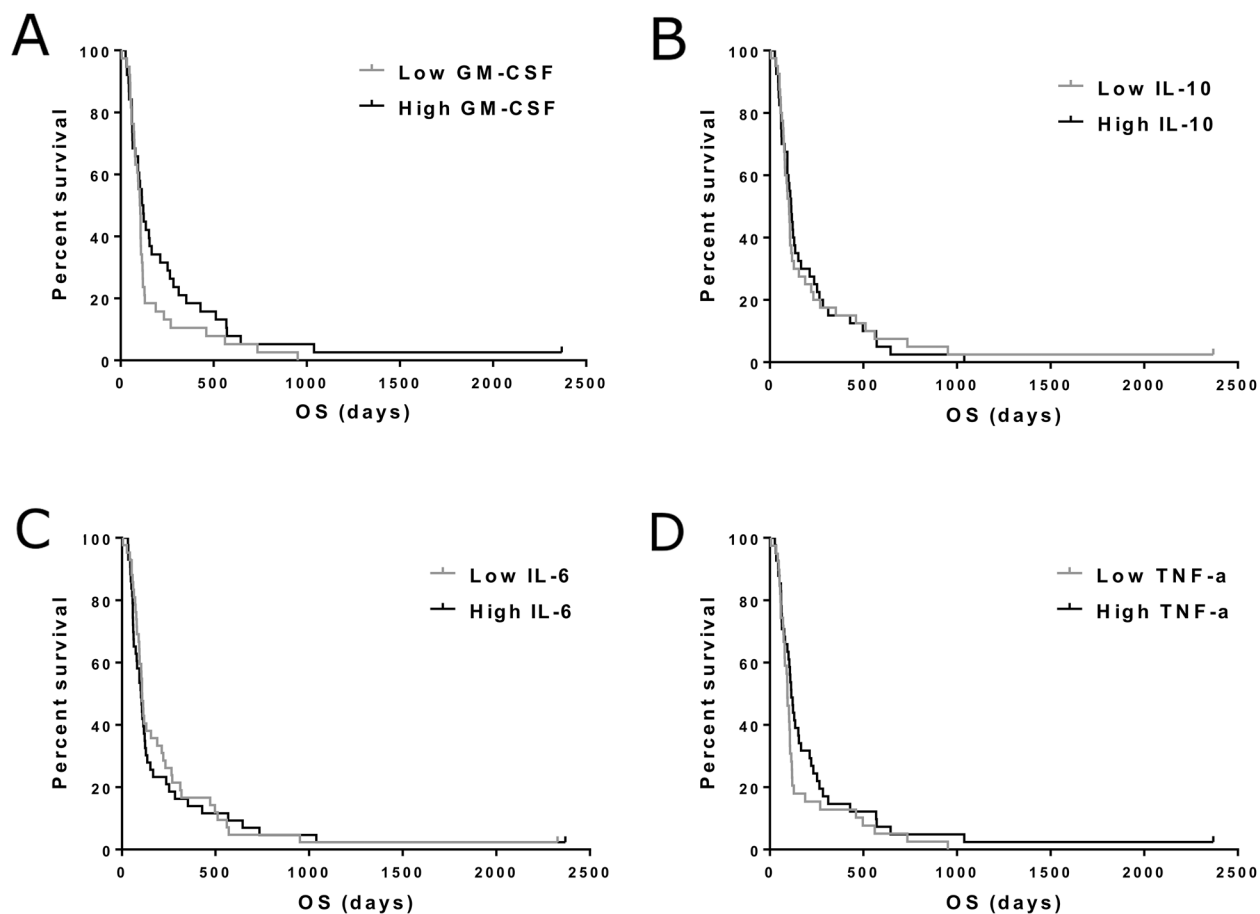

**Supplementary Figure 1: Overall survival in patients in patients with low or high baseline GM-CSF, IL-10, IL-6 and TNF $\alpha$ .** (Panels A-D): Patients were grouped to high and low baseline groups using the median baseline concentration as cutoff. No significant differences in overall survival between the groups were found.

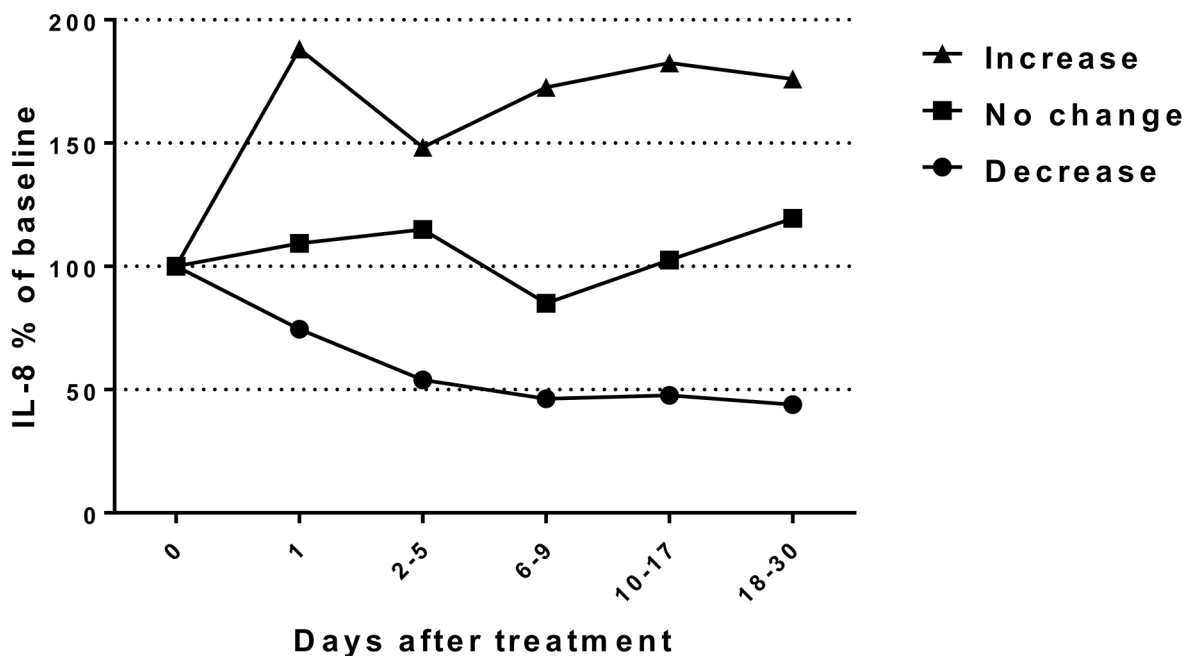

**Supplementary Figure 2: Mean IL-8 concentrations 30 days after treatment in different IL-8 change groups.** Patients were assigned to groups based on methodology detailed in materials and methods. Mean concentrations as percentage of the baseline value are presented for each group in different post-treatment timeframes.

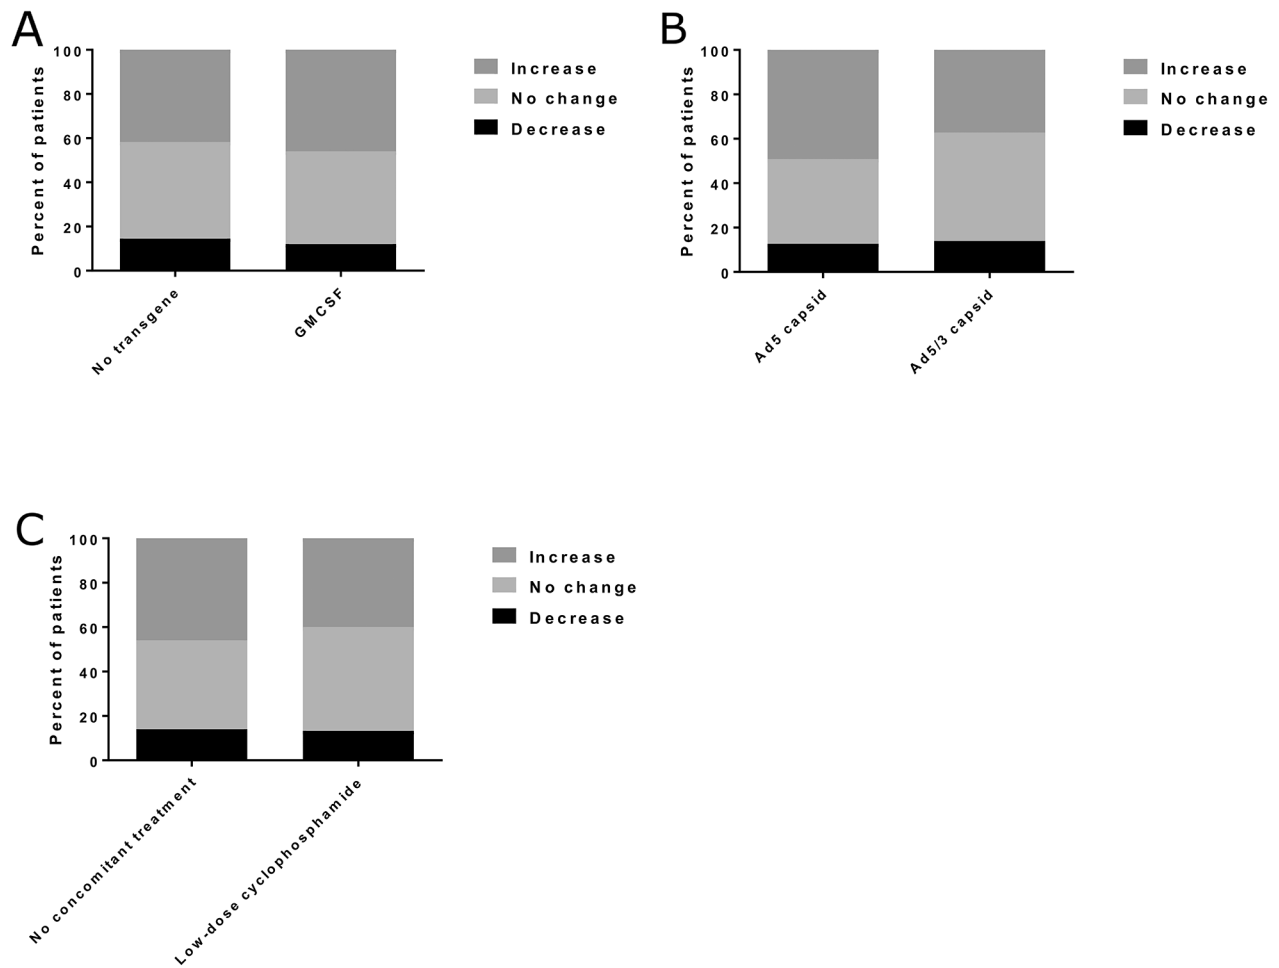

**Supplementary Figure 3: Proportions of IL-8 changes in different treatment characteristics groups. (Panels A-C)** Patients were grouped based on viral capsid, viral transgene or concomitant treatment used in the first adenovirus treatment. The differences between the groups were not considered significant.

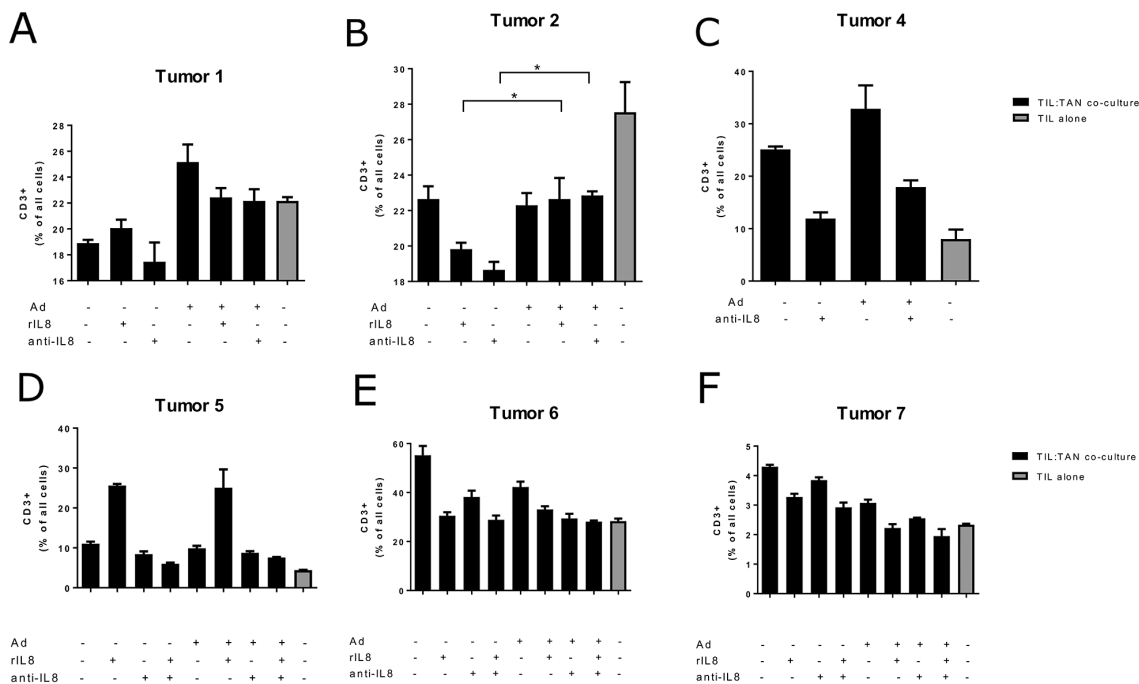

**Supplementary Figure 4: T cell proliferation in ovarian tumor derived TIL and TAN co-cultures obtained from human patients. (Panels A-F)** T cell proliferation was measured after 6 day incubation of TIL-TAN co-cultures or TILs alone. Bars represent the percentage of T cells in the culture. Ad = Ad5/3-d24. rIL8 = recombinant IL-8. Asterisks indicate the significance of findings: \* (p<0.05), \*\* (p<0.01), \*\*\* (p<0.001), \*\*\*\* (p<0.0001).

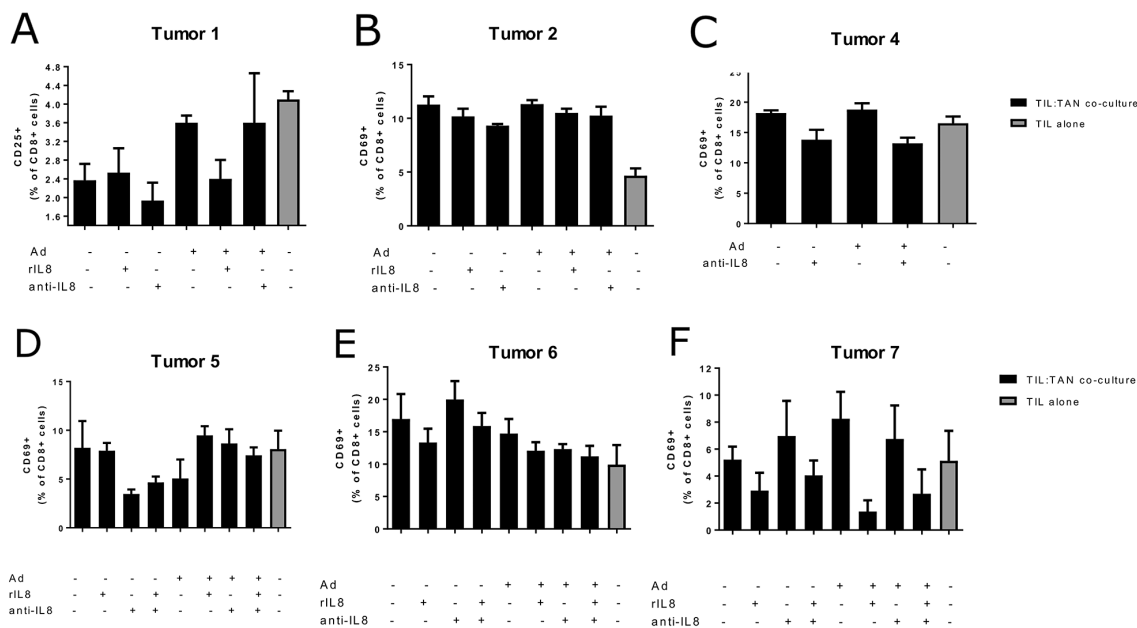

**Supplementary Figure 5: Cytotoxic T cell activation in ovarian tumor derived TIL and TAN co-cultures obtained from human patients.** Cytotoxic T cell activation was measured after a 6 day incubation of TIL-TAN co-cultures or TILs alone. Bars represent the percentage of activated CD25/CD69-positive cytotoxic T cells in the culture. Ad = Ad5/3-d24. rIL8 = recombinant IL-8. **(Panel A):** Activation marker CD25 was used for samples from Tumor 1. **(Panels B-F):** Activation marker CD69 was used for samples from other tumors.

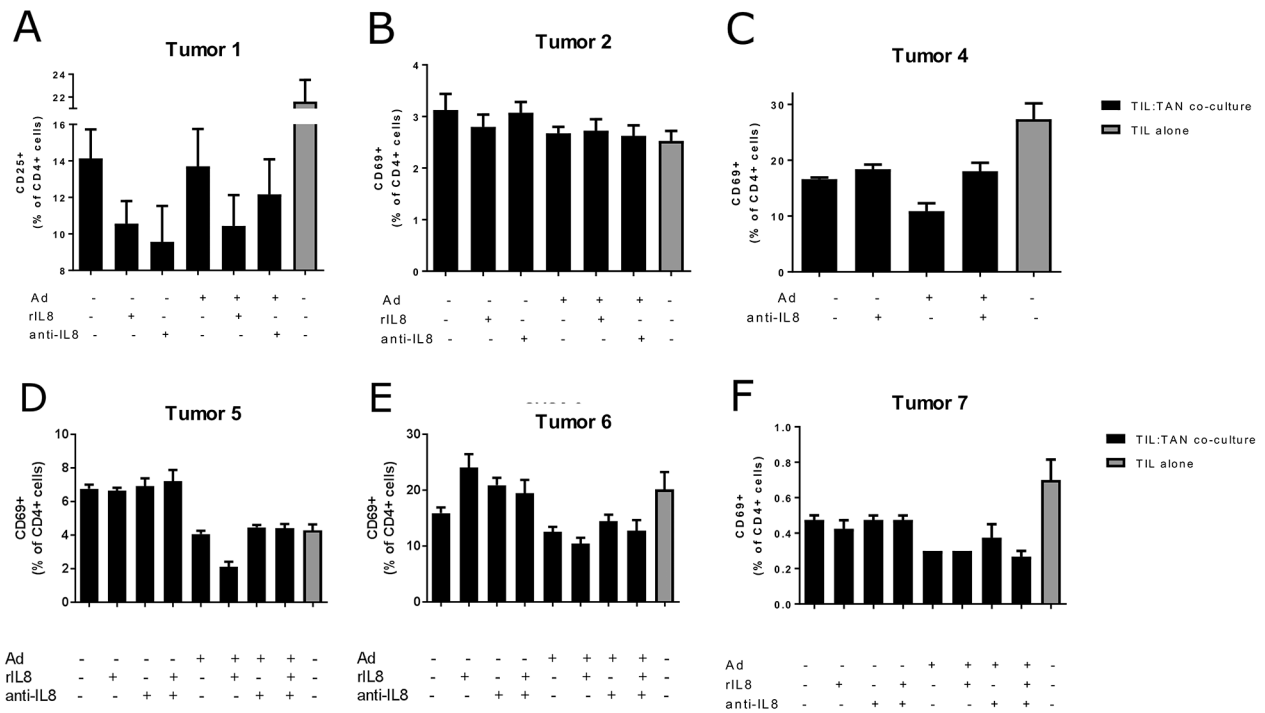

**Supplementary Figure 6: Helper T cell activation in ovarian tumor derived TIL and TAN co-cultures obtained from human patients.** Helper T cell activation was measured after 6 day incubation of TIL-TAN co-cultures or TILs alone. Bars represent the percentage of T cells in the culture. Ad = Ad5/3-d24. rIL8 = recombinant IL-8. **(Panel A)**: Activation marker CD25 was used for samples from Tumor 1. **(Panels B-F)**: Activation marker CD69 was used for samples from other tumors.

**Supplementary Table 1: Patient characteristics.**

See Supplementary File 1

Supplementary Table 2: Multivariate analysis for prognostic value of baseline IL-8 and IL-8 change

|                          |               | Hazard ratio (HR) for cancer mortality (n=98) |                     |
|--------------------------|---------------|-----------------------------------------------|---------------------|
|                          |               | P value                                       | HR (95% CI)         |
| Age                      |               | 0.395                                         | 0.992 (0.974-1.010) |
| Sex (female/male)        |               | 0.804                                         | 1.073 (0.616-1.868) |
| Tumor type               |               | 0.360                                         |                     |
| (vs. Panc/Chol/HCC)      | CRC/Gastric   | 0.521                                         | 1.269 (0.612-2.631) |
|                          | Melanoma      | 0.372                                         | 0.614 (0.210-1.793) |
|                          | Lung          | 0.819                                         | 1.140 (0.371-3.503) |
|                          | Gynecological | 0.241                                         | 0.620 (0.278-1.379) |
|                          | Other         | 0.286                                         | 0.674 (0.327-1.390) |
| WHO (low/high)           |               | 0.002                                         | 0.467 (0.288-0.755) |
| Baseline IL-8 (low/high) |               | 0.010                                         | 0.502 (0.297-0.847) |
| IL-8 change              |               | 0.004                                         |                     |
| (vs. No change)          | Increase      | 0.060                                         | 0.576 (0.324-1.024) |
|                          | Decrease      | 0.001                                         | 0.270 (0.122-0.596) |

Supplementary Table 3: Patients included in tumor gene expression analyses

| Patient ID | Age | Sex <sup>a</sup> | WHO score | Diagnosis         | Sample <sup>b</sup> | Biopsied tumor | Virus               | Imaging response <sup>c</sup> | OS days |
|------------|-----|------------------|-----------|-------------------|---------------------|----------------|---------------------|-------------------------------|---------|
| C341       | 66  | F                | 1         | Colorectal cancer | B                   | Liver          | Ad5/3-hTERT-CD40L   | SMD                           | 314     |
| I398       | 25  | F                | 1         | Melanoma          | B                   | Lymph node     | Ad5/3-E2F-d24-GMCSF | PMD                           | 127     |
| O279       | 62  | F                | 2         | Ovarian cancer    | B                   | Liver          | Ad5/3-d24-GMCSF     | SMD                           | 101     |
| O340       | 75  | F                | 0         | Ovarian cancer    | B                   | Left rib       | Ad5/3-E2F-d24-GMCSF | MMR                           | 444     |
| O38        | 36  | F                | 1         | Ovarian cancer    | B                   | Breast         | Ad5/3-d24-GMCSF     | MMR                           | 336     |
| P407       | 71  | M                | 2         | Prostate cancer   | B                   | Prostate       | Ad5-d24-RGD-GMCSF   | PMD                           | 100     |
| R356       | 40  | F                | 1         | Breast cancer     | B                   | Right Breast   | Ad5/3-E2F-d24-GMCSF | PMD                           | 102     |
| R367       | 59  | F                | 1         | Breast cancer     | B                   | Sternum        | Ad3-hTERT-E1A       | MMR                           | 204     |
| X373       | 57  | F                | 2         | Cervical cancer   | B                   | Kidney         | Ad5/3-E2F-d24-GMCSF | SMD                           | 144     |
| H333       | 61  | F                | 2         | Pancreatic cancer | A                   | Abdomen        | Ad5/3-E2F-d24-GMCSF | N/A                           | 50      |
| H339       | 65  | M                | 1         | Pancreatic cancer | A                   | Abdomen        | Ad5/3-E2F-d24-GMCSF | N/A                           | 29      |
| O391       | 53  | F                | 2         | Ovarian cancer    | A                   | Abdomen        | Ad5/3-E2F-d24-GMCSF | PMD                           | 143     |
| C335       | 71  | F                | 2         | Colorectal cancer | P                   | Pleura         | Ad5/3-hTERT-CD40L   | N/A                           | 34      |
| K326       | 65  | M                | 2         | Lung cancer       | P                   | Pleura         | Ad3-hTERT-E1A       | N/A                           | 72      |
| M329       | 67  | M                | 3         | Mesothelioma      | P                   | Pleura         | Ad5/3-hTERT-CD40L   | N/A                           | 64      |

<sup>a</sup> F=Female; M=Male.

<sup>b</sup> A= Ascites fluid; B=Biopsy; P=Pleural fluid.

<sup>c</sup> MMR=Minor metabolic response; SMD=Stable metabolic disease; PMD=Progressive metabolic disease; N/A=Not available.

**Supplementary Table 4: Ovarian tumor patients and tumor histology types**

| <b>Tumor number</b> | <b>Histological diagnosis</b>          |
|---------------------|----------------------------------------|
| Tumor 1             | Mucinous cystadenoma                   |
| Tumor 2             | Clear cell carcinoma stage IC1         |
| Tumor 4             | Semimalignant serous cystadenoma       |
| Tumor 5             | High grade serous carcinoma stage IIIC |
| Tumor 6             | Benign fibroma                         |
| Tumor 7             | Mucinous carcinoma stage IC2           |
